# Supplementary material for: A Robust Protocol for Using Multiplexed Droplet Digital PCR to Quantify Somatic Copy Number Alterations in Clinical Tissue Specimens
Source: PubMed Central journal article supplement (PMC4990255; doi:10.1371/journal.pone.0161274), 2016-08-18

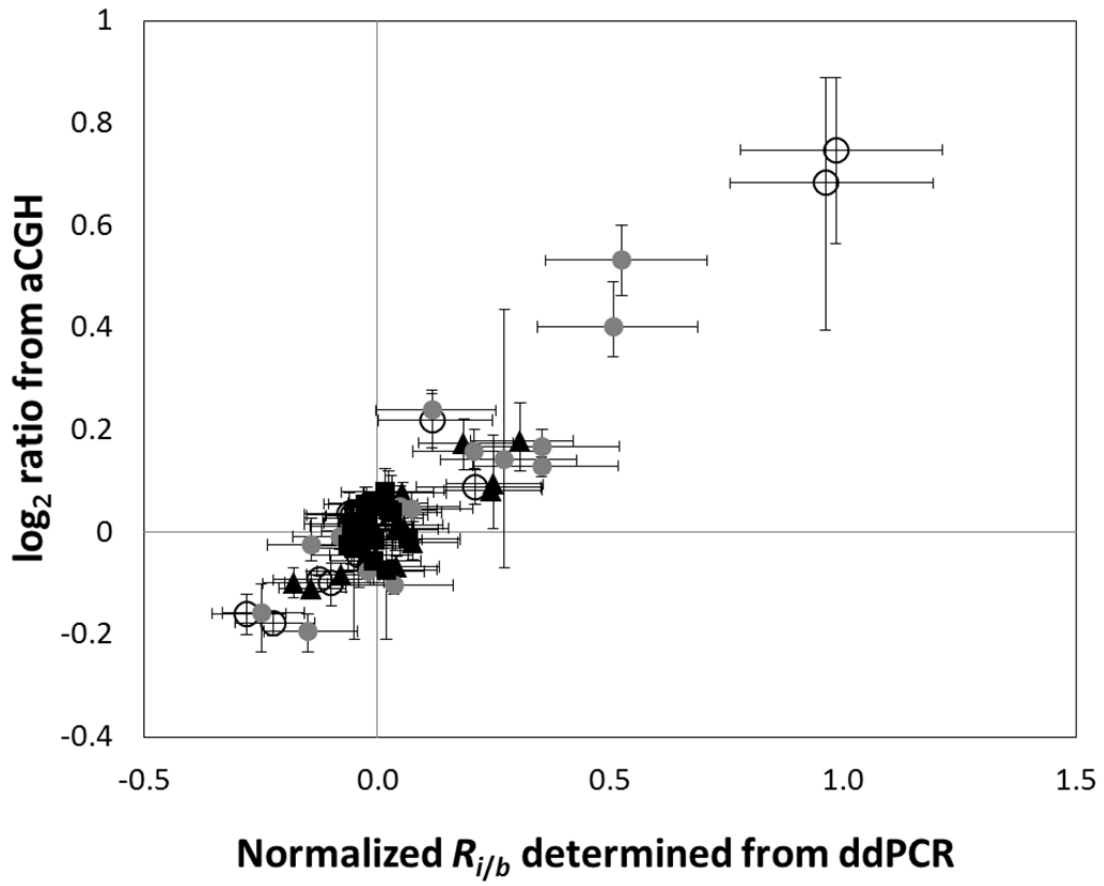

Supplement: pone.0161274.s005.pdf [file pone.0161274.s005.pdf]
