# Supplementary material for: A Robust Protocol for Using Multiplexed Droplet Digital PCR to Quantify Somatic Copy Number Alterations in Clinical Tissue Specimens
Source: PubMed Central journal article supplement (PMC4990255; doi:10.1371/journal.pone.0161274), 2016-08-18
Supplement: pone.0161274.s008.pdf [file pone.0161274.s008.pdf]

| Locus                      | I <sup>1</sup> (bp) | Forward Primer <sup>2</sup> | Reverse Primer <sup>2</sup> | Probe <sup>2,3</sup>         |
|----------------------------|---------------------|-----------------------------|-----------------------------|------------------------------|
| <i>HFE2</i>                | 97                  | gggatccagttgtcgattca        | agctgtctgcgaatgattatag      | aaactgtaaccctgggaaccatgt     |
| <i>CPT2</i>                | 106                 | ccagcagtgaaacctggg          | ctgggtaggaagagacattgc       | cctgtggctctgatggcttgggt      |
|                            | 125                 | tacgggcagataaacacaaa        | cagttgtcatgacagcatacc       | cctgtggctctgatggcttgggt      |
|                            | 151                 | cctgcatcgggcagataaa         | aagagacattgcagcctatcc       | cctgtggctctgatggcttgggt      |
|                            | 179                 | gatcatcttgctgagctctac       | aagagacattgcagcctatcc       | cctgtggctctgatggcttgggt      |
|                            | 199                 | tacgggcagataaacacaaat       | ctaaggccttccacacatt         | cctgtggctctgatggcttgggt      |
| <i>KCNS3</i>               | 252                 | tgaccgacactgtttgctctg       | aactcccggcattgcg            | cctgtggctctgatggcttgggt      |
|                            | 101                 | gcttatcgctatctcctcttg       | catccaattctccatcctcatt      | cgttca cagca tgtcggagtcca    |
|                            | 124                 | tcctcctgagcgtgggt           | caatgacgcgactcca            | cgttca cagca tgtcggagtcca    |
|                            | 154                 | gtactgctgtccgctaag          | aatgacgcgactcca             | cgttca cagca tgtcggagtcca    |
|                            | 178                 | ggtagcctccggaagaaa          | cttccagcaccgcat             | cgttca cagca tgtcggagtcca    |
|                            | 233                 | gtgctggcctcactgt            | acagccaa cgtggcactaga       | cgttca cagca tgtcggagtcca    |
| <i>ACADM</i>               | 278                 | ccagcgtactgctctg            | aa cgtggcactagaaggaaata     | cgttca cagca tgtcggagtcca    |
|                            | 101                 | gatgttcagactagaggaaattgt    | agctccattgcaacttt           | ttaattggtagcggagctgtttc      |
| <i>MRPS9</i>               | 100                 | aacgtgaaacttacacagagga      | gtttctgactcttccactca        | cttttctatgttgaactctcaactctgc |
| <i>SLC25A12</i>            | 106                 | gatcacatcgggtgatacagac      | gaaaccaagcaactagga          | tttgcagctgcaaacgtggc         |
| <i>GRIK2</i>               | 99                  | gacctttgctcttgatgttg        | gatggagagactgtggtatt        | aacacactgatacggtagggct       |
| <i>RPP30</i>               | 98                  | gggaaggaaagtagacagatgtt     | gaagccatctctgactcttag       | agcaaaagtaaacaggaagacacttgg  |
| <i>CNOT2</i>               | 113                 | ggaaatgatagaaccactcca       | tattatgctggcagctctct        | agcatgacgactcagggttaggt      |
| <i>SLC6A15</i>             | 98                  | gttctgctgctcaacttat         | cctctaa gttcagggctctttc     | accctctctcttataaggta cagatgc |
| <i>LAT</i>                 | 97                  | cgctctggactgagctga          | aggtagcctgggtgtgata         | cccagaaccagcctgtgaggat       |
| <i>KRT9</i>                | 92                  | gctggccttacttgataag         | gtcctcttctgtgta ccaatc      | attctccaggctgtttggcctc       |
| <i>BCKDHA</i>              | 105                 | caccagtgacgacagttcag        | cctggctcagcagatagtg         | ccgctcgggtgagatgcaatta       |
| <i>D4S1652 (Standard)</i>  | 144                 | aatccctgggta cattatattg     | cagacattcttattctta cctcc    | at+Ctat+Cta+T+Ctat+Cta+Ct    |
| <i>D4S1652 (Optimized)</i> | 146                 | ggaaacctcgggta cattatattg   | cagacattcttattctta cctcc    | at+Ctat+Cta+T+Ctat+Cta+Ct    |
| <i>D3S1234</i>             | 111                 | cctgtgagacaaagcaagac        | gacattaggcacaaggctaa        | a+Ca+Ca+Ca+Ca+c+Ac           |
| <i>D3S1300</i>             | 247                 | agctcaacttctagtcagcct       | gaatgcaaatccccagatg         | a+Ca+Ca+Ca+Ca+c+Ac           |
| <i>D3S1300sh</i>           | 128                 | agctcaacttctagtcagcct       | ccacatgacgtcctttgtagt       | a+Ca+Ca+Ca+Ca+c+Ac           |
| <i>D3S4010</i>             | 108                 | caactccaccactgcaatc         | tccctgttttgggaatctt         | a+T+Catca+T+Catca+T+Catc     |
| <i>D3S1228</i>             | 86                  | tccttaactctttctgtgagttg     | tctaggaaaggga ttggaagga     | a+Ca+Ca+Ca+Ca+c+Ac           |
| <i>TERTx2</i>              | 124                 | gaccaagcacttctactc          | ggaaaccaagaagatggtctc       | agagagctgagtaggaaggaggc      |
| <i>RH13724</i>             | 119                 | tcagaatcatttctcaatagcc      | actccaggagcactcaaat         | a+Ca+Ca+Ca+Ca+c+Ac           |
| <i>D7S2550</i>             | 259                 | aagttcaattgtctcggtt         | agtctcctgctcaacact          | a+Ca+Ca+Ca+Ca+c+Ac           |
| <i>EGFRx28</i>             | 100                 | cattagctcttagaccacagac      | caaaaggaa tgcaacttccaaa     | tgcaactgttcaaccgactagcca     |
| <i>D8S1788</i>             | 209                 | agttcaagcctagttcataaaag     | aagactccta atgtcta ttttctag | a+Ca+Ca+Ca+Ca+c+Ac           |
| <i>CSMD1x5</i>             | 93                  | cccttcagactcagagaacaac      | agctgaa agtca gtagaagacc    | cggactgacactgga ccaattct     |
| <i>D8S1774</i>             | 262                 | tgcataggtgctgactttg         | cctgaggcctaggca tta ttg     | a+Ca+Ca+Ca+Ca+c+Ac           |
| <i>MYCx2</i>               | 94                  | gagacatgggaaaccagagtt       | gagaagcctccacatac           | ccggacgacgagacttcaaaa        |
| <i>CDKN2Ax1</i>            | 120                 | ggagccttcggctgact           | atcggcctccgaccgtaa          | tattcgggtgctgttggcagc        |
| <i>D9S1748</i>             | 125                 | caactcaga agtcagtgagtt      | gtgcttgaatacaactttcc        | a+Ca+Ca+Ca+Ca+c+Ac           |
| <i>D9S1751</i>             | 178                 | ttgtgattctgcttcaaatgttttaac | cgtaa agtctctattaca cagag   | a+Ca+Ca+Ca+Ca+c+Ac           |
| <i>D9S171</i>              | 175                 | agcta agtgaacctactctgtct    | accctgacatgaggtagtct        | a+Ca+Ca+Ca+Ca+c+Ac           |
| <i>CCND1x5</i>             | 113                 | gaggatgttcataaaggccagta     | ctgtaacataaaaggcagaagg      | a+Ca+Ca+Ca+Ca+c+Ac           |
| <i>D11S971</i>             | 111                 | aggacacagcctgactctag        | accaggca ttgactaaaag        | ttcat+T+Cat+T+Cat+T+Cattca   |
| <i>H14A713</i>             | 191                 | aacccaaaccacagataacc        | gtgccgactgatacaagg          | a+Ca+Ca+Ca+Ca+c+Ac           |

<sup>1</sup> Amplicon lengths determined from primer blast ([www.ncbi.nlm.nih.gov/tools/primer-blast/](http://www.ncbi.nlm.nih.gov/tools/primer-blast/)) and/or from the UCSC genome browser (<https://genome.ucsc.edu/>). For microsatellite biomarkers with a reported size range, the amplicon length used is the median of the range.

<sup>2</sup> Sequences reported in 5' to 3' direction. LNA bases are identified by capitals and a preceding + symbol.

<sup>3</sup> All DNA AND LNA probes were labelled with either 5' FAM or 5'-HEX. DNA probes contained an internal ZEN quencher and a 3'-IBFQ, while LNA probes contained only a 3'-quencher (IBFQ or BHQ1).
